# Supplementary material for: Biofuel production by solar-powered microwave pyrolysis of biomass: a case study on process optimization, environmental, and techno-economic aspects
Source: Research Square preprint supplement (doi:10.21203/rs.3.rs-1530278/v1), 2022-04-11
Supplement: Supplementary file 1 [file bbb072b753a0df73762b4693.docx]

**Supplementary Materials**

**Biofuel production by solar-powered microwave pyrolysis of biomass: a case study on process optimization, environmental, and techno-economic aspects**

Ahmed Elsayed Mahmoud Fodah a,*, Taha Abdelfattah Mohammed Abdelwahab a,*

a College of Agricultural Engineering, Al-Azhar University, Cairo 11765, Egypt

* Corresponding Authors: [ahmedfodah@azhar.edu.eg](mailto:ahmedfodah@azhar.edu.eg), tahaabdelfattah@Azhar.edu.eg

<https://orcid.org/0000-0002-2345-0288>, <https://orcid.org/0000-0002-4916-8117>

**Appendix A**

**Sizing of solar PV system**

***Determination of designed electrical load***

In order to meet the losses occurred in the components of the PV system, the designed load should be higher than the actual load. The designed load was determined as 780 kWh/day based on the factor of safety to be 1.5.

(1)

The factor 1.5 accounts for losses in the PV system components and the uncertainty to anticipate daily electrical load of appliances and also accounts for all the system efficiencies, including wiring and interconnection losses as well as the efficiency of the battery charging and discharging cycles.

***Determination of PV array size (Wp)***

A peak sun shine hour, specifically, is the hour during which the intensity of sunlight is supposed to be 1,000 watts per square meter. The day length may be longer, but peak sun shine hours are less than that. The average peak sunshine hours per day on the optimum tilted surface in Egypt is considered as 7.0 h/day. Considering the available peak watt of module as 200Wp in the market, the number of modules for the purpose was 3, each of 200 *Wp*.

***Determination of inverter size (W) and charge controller capacity (A)***

The input rating of the inverter should never be lower than the PV array rating. The maximum continuous input rating of the inverter (*W*) should be about 10% higher than the PV array size to allow safe and efficient operation of PV power system as reported by SECO. Hence, the inverter size can be determined using equation (4). The inverter converts the DC power to AC power for operating AC electrical load. The charge controller saves the battery from over charging and over discharging and feeds the right configuration of current and voltage to the load. The charge controller capacity can be determined based on the PV array size and the operating voltage (such as 24V) designed for battery bank using equation (5).

(5)

*Determination of battery bank size (Ah).* In actual practice, the battery bank size (*Ah*) can be determined by using the equation (6).

The number of autonomy days for the PV system is taken to be 3 to account for three consecutive cloudy days and to improve battery life with shallow depth of discharge.

As per equation (6), the battery bank size was determined to be 300 *Ah* and 12 V. Thus, 2490 number of 300 *Ah*, 12 *V* batteries were required.

**Experimental observations related to solar PV system components**

The observations of various electrical parameters, measured during the operation of solar PV system were utilized to evaluate its performance. The electrical parameters such as open circuit voltage (*VOC*), short circuit current (*ISC*), fill factor (*FF*), solar radiation (*IT*)(*W/m2*) were measured throughout the year 2020 by using the instrument namely solar PV analyser (SEAWARD PV 200). The output and input power of the inverter were measured by AC/DC multi meter. The hourly experimental observations were measured for typical clear days for a month and continuing throughout the year 2020 in the warm and humid climatic condition as per the following equations.

Due to the increased cell temperatures of the module compared to standard test condition in open field situation and other environmental factors such as dust deposition and reduced solar intensity, the module efficiency is reduced by 0.2 % annually. Therefore, average value for the efficiencies during 1st and last year has been considered i.e., *A* is the area of module (m2),

Overall conversion efficiency of solar PV system:

*Energy output of PV system.* Energy output from the PV system is usually cite-specific and variable. It depends on the solar radiation, ambient air temperatures and efficiency of the module in on-field condition. The output of the PV system has been calculated with the equations (11 and 12).

Alternatively, *Eout* can also be calculated as per equation (13):

**Carbon Dioxide (CO2) emission, mitigation and carbon credit**

*CO2 emission.* On-farm burning of CS is now-a-days the most prevailing practice followed throughout Egypt causing the emission of CO2 to the environment. It has been reported that by burning 1 kg of CS, 1.5 kg CO2 is released to the environment.

*CO2 mitigation.* CO2 mitigation can be accomplished by the use of solar PV system and preventing on-farm burning of CS. The electricity is mostly generated in Egypt from the coal based thermal power plant. It has been reported that a coal based thermal power plant produces 0.98 kg of CO2/kWh. In Egyptian conditions, considering 40% and 20% losses of energy in transmission and distribution systems respectively, the amount of emission is 1.5 kg of CO2/kWh of electricity generated from coal thermal power plant.

*Carbon credit earned.* One carbon credit represents the mitigation of 1 ton of CO2 emission. The emissions of CO2 due to various energy utilizations and generations pose a major contributing factor to the greenhouse effects. International treaties for mitigating emissions of greenhouse gases across the globe have therefore introduced carbon credit trading which is an administrative approach for controlling pollution by providing economic incentives for the efforts to reduce the emissions of pollutants. Carbon credits are therefore a tradable permit scheme prevailing among the countries included in the strategic planning of controlling the emissions of greenhouse gases. The amount of carbon credit earned in the present study due to the use of PV system and preventing CS burning can be calculated by the equation (15).

(15)

The amount $ 2.5/ton (1$ = Rs 75) represents the monetary value of mitigating one ton of CO2 emission. The price of carbon credit is as per European Climate Exchange ([www.ecx.eu](http://www.ecx.eu)).
